# Supplementary material for: Diagnostic Accuracy of Specific IgE to Lipid Transfer Proteins (LTPs) in Food Allergy: A Systematic Review
Source: Preprints.org preprint supplement (doi:10.20944/preprints202409.2091.v1), 2024-09-26
Supplement: Supplementary file 2 [file supplementary]

**Supplementary S2.** Full literature search strategy used for MEDLINE. MEDLINE was searched using both the Advanced Search and the Medical Subjects Headings (MeSH) Search. Literature search strategy used for Web Of Science (WOS), Scopus, and clinicaltrials.org databases was adapted from the one used for MEDLINE.

## **MEDLINE**

1. “component resolved diagnostics”. ti,ab.
2. crd.ti,ab.
3. “molecular-based allergy diagnostics”. ti,ab.
4. mbad. ti,ab.
5. “molecular allergy diagnostics”. ti,ab.
6. mad. ti,ab.
7. “precision allergy molecular diagnostic applications”. ti,ab.
8. “allergen component”. ti,ab.
9. immunocap. ti,ab.
10. “immuno cap”. ti,ab.
11. “immuno near/2 cap”. ti,ab.
12. “Immuno Solid-phase Allergen Chip”. ti,ab.
13. ISAC. ti,ab.
14. “immuno solid phase allergen chip”. ti,ab.
15. “ALEX allergy explorer”. ti,ab.
16. alex. ti,ab.
17. euroline. ti,ab.
18. “specific IgE”. ti,ab.
19. “specific immunoglobulin E”. ti,ab.
20. sIgE. ti,ab.

21. Ltp. ti,ab.
22. Ltps. ti,ab.
23. nsLTP. ti,ab.
24. “lipid transfer protein”. ti,ab.
25. “lipid transfer proteins”. ti,ab.
26. “lipid-transfer protein”. ti,ab.
27. “lipid-transfer proteins”. ti,ab.
28. apple. ti,ab.
29. Rosales. ti,ab.
30. rosace\*. ti,ab.
31. Malus. ti,ab.
32. Peach. ti,ab.
33. Prunus. ti,ab.
34. prunus persica. ti,ab.
35. Lemon. ti,ab.
36. Walnut. ti,ab.
37. Nut. ti,ab.
38. Peanut. ti,ab.
39. Juglans. ti,ab.
40. hazelnut. ti,ab.
41. Corylus. ti,ab.
42. Filbert. ti,ab.
43. Avellana. ti,ab.
44. Almond. ti,ab.
45. Chestnut. ti,ab.
46. Tomato. ti,ab.

47. solanace\*. ti,ab.
48. Kiwi. ti,ab.
49. actinidiace\*. ti,ab.
50. Celery. ti,ab.
51. apiace\*. ti,ab.
52. Wheat. ti,ab.
53. poace\*. ti,ab.
54. “triticum aestivum”. ti,ab.
55. strawberry. ti,ab.
56. Lettuce. ti,ab.
57. asterace\*. ti,ab.
58. Lentil. ti,ab.
59. fabace\*. ti,ab.
60. Soy. ti,ab.
61. Soyabean. ti,ab.
62. Pomegranate. ti,ab.
63. Olive. ti,ab.
64. Mais. ti,ab.
65. Grape. ti,ab.
66. “Mal d 3”. ti,ab.
67. “Pru p 3”. ti,ab.
68. “Jug r 3”. ti,ab.
69. “Ara h 9”. ti,ab.
70. “Cor A 8”. ti,ab.
71. “Pru du 3”. ti,ab.
72. “Cas s 8”. ti,ab.

73. "Sola l 3". ti,ab.
74. "Lyc e 3". ti,ab.
75. "Act c 10". ti,ab.
76. "Api g 2". ti,ab.
77. "Sola l 6". ti,ab.
78. "APi g 6". ti,ab.
79. "Tri a 14". ti,ab.
80. "Fra a 3". ti,ab.
81. "Lac s 1". ti,ab.
82. "Len c 3". ti,ab.
83. "Pun g 1". ti,ab.
84. "Zea m 14". ti,ab.
85. "Vit v 1". ti,ab.
86. "Ole e 7". ti,ab.
87. "Cit l 3". ti,ab.
88. Allerg\*. ti,ab.
89. sensitivit\*. ti,ab.
90. hypersensitivit\*. ti,ab.
91. anaphyla\*. ti,ab.
92. "oral allergy syndrome". ti,ab.
93. "pollen food syndrome". ti,ab.
94. urticaria. ti,ab.
95. Nausea. ti,ab.
96. Vomiting. ti,ab.
97. Diarrhoea. ti,ab.
98. Diarrhea. ti,ab.

99. Angioedema. ti,ab.
100. "abdominal pain". ti,ab.
101. itch. ti,ab.
102. Rush. ti,ab.
103. Gastrointestinal. ti,ab.
104. Dyspnea. ti,ab.
105. Hypotension. ti,ab.
106. Tachycardia. ti,ab.
107. "loss of consciousness". ti,ab.
108. "systemic reactions". ti,ab.
109. "systemic reaction". ti,ab.
110. "local reaction". ti,ab.
111. "local reactions". ti,ab.
112. OR/1-21
113. OR/22-88
114. OR/89-112
115. AND/113-115

*Medical Subjects Headings - MeSH Search*

((("Food Hypersensitivity/diagnosis"[Mesh]) AND "lipid transfer protein" [Supplementary Concept]) AND ("Immunoglobulin E"[Majr])
